# Supplementary material for: Atomic-level energy storage mechanism of cobalt hydroxide electrode for pseudocapacitors
Source: PubMed Central journal article supplement (PMC5424148; doi:10.1038/ncomms15194), 2017-05-08
Supplement: ncomms15194-s1.pdf [file ncomms15194-s1.pdf]

## 1 Supplementary Figures

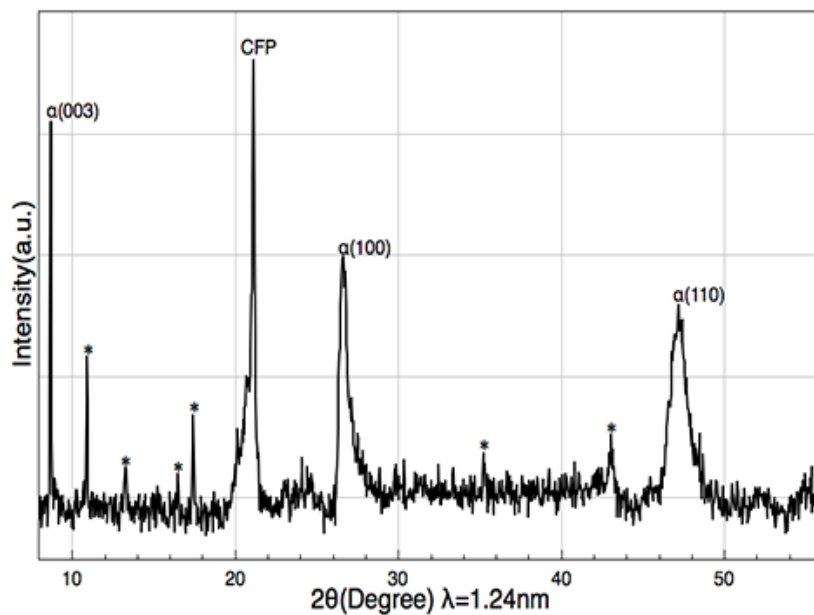

2

3 **Supplementary Figure 1** | Synchrotron XRD pattern of as-prepared  $\text{Co(OH)}_2$ . The  
4 appearance of other peaks which belongs to  $\text{Co(NO}_3)_2 \cdot x\text{H}_2\text{O}$  ( $x=2,4,6,8$ ) and  
5  $\text{CoNO}_3\text{OH} \cdot \text{H}_2\text{O}$  indicates that during the synthesis the electrodeposition imports  
6 nitrates into  $\alpha\text{-Co(OH)}_2$  with formation of large interlayer spacing.

7

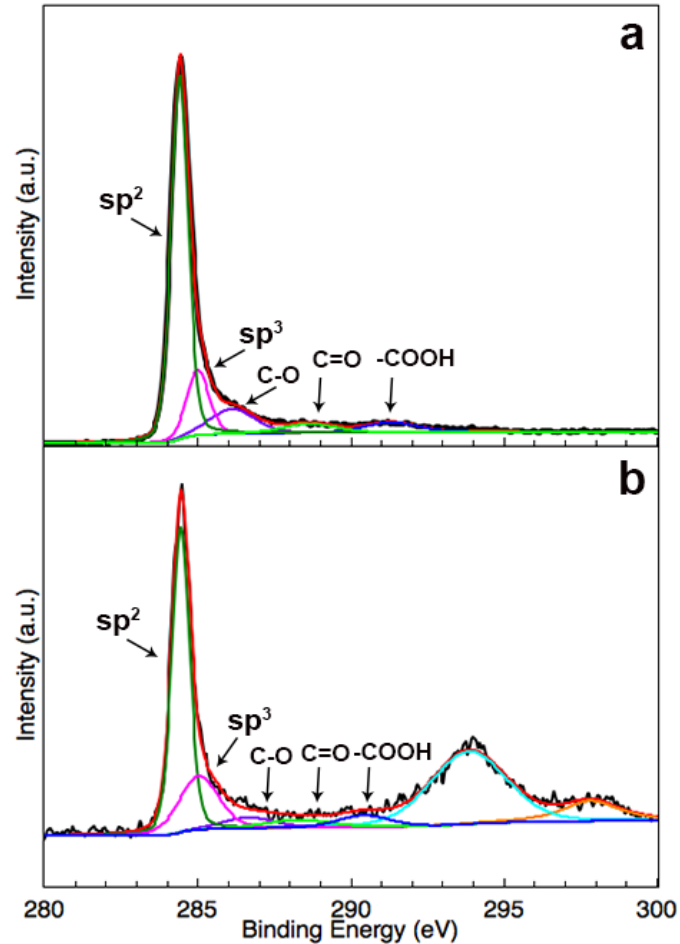

8

9 **Supplementary Figure 2** | X-ray photoelectron spectroscopy spectra of C 1s. **a**, The  
 10 XPS spectrum before the electrodeposition of Co(OH)<sub>2</sub>. **b**, The XPS spectrum after the  
 11 electrodeposition of Co(OH)<sub>2</sub>. For the pristine carbon fiber paper, it can be seen that  
 12 the spectrum can be decomposed into five components, corresponding to carbon  
 13 atoms in different functional groups: sp<sup>2</sup>-hybridized carbon at 284.5 eV,  
 14 sp<sup>3</sup>-hybridized carbon at 285 eV, C-O at 286.7 eV, C=O at 288.3 eV and -COOH at  
 15 290.4 eV. However, after the electrodeposition of Co(OH)<sub>2</sub>, the spectrum can be  
 16 decomposed with two more peaks at 293.9 and 297.8 eV. -C-[O-Co]<sub>2</sub> or -C-[O-Co]<sub>3</sub>  
 17 ascribed to the electrodeposition are responsible for higher absorbing transition  
 18 energy, corresponding to the peaks at 293.9 and 297.8 eV, respectively, which  
 19 enables us an improved binding power between Co(OH)<sub>2</sub> and the substrate.

20

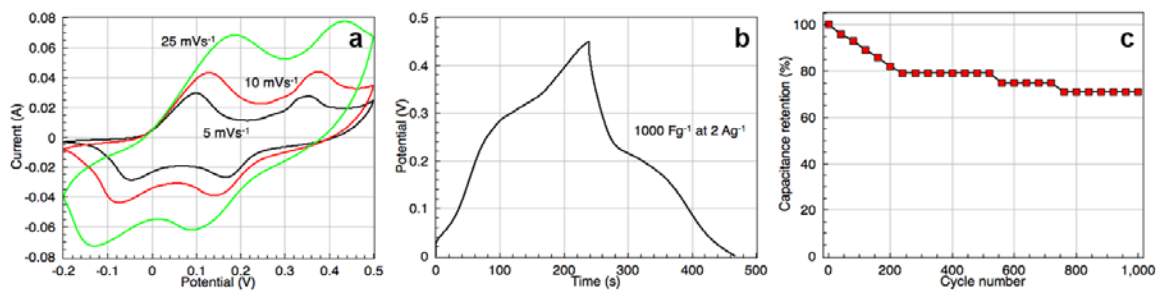

21

22 **Supplementary Figure 3** | Electrochemical performance of Co(OH)<sub>2</sub>/Ni foam. **a**, The  
23 cyclic voltammetry curves collected at 5, 10 and 25 mVs<sup>-1</sup> of Co(OH)<sub>2</sub>. **b**, The  
24 charge/discharge curve collected at 2 Ag<sup>-1</sup> exhibits a specific capacitance of 1000 Fg<sup>-1</sup>.  
25 **c**, The synthesized Co(OH)<sub>2</sub> on Ni foam shows poor cyclic stability and the  
26 capacitance retention only reaches 71.4% of its initial capacitance after 1000 cycles.

27

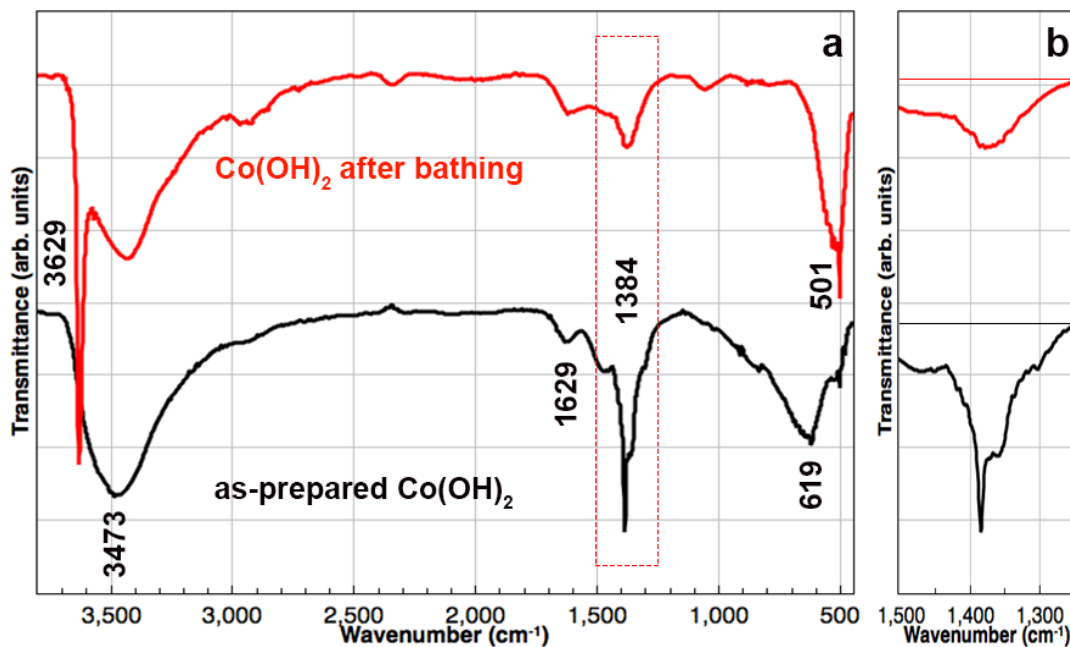

28

29 **Supplementary Figure 4** | FT-IR analysis of  $\text{Co(OH)}_2$  before and after contacting  
 30 with KOH solution. **a**, FT-IR spectra of the as-prepared  $\text{Co(OH)}_2$  and  $\text{Co(OH)}_2$  after  
 31 bathing in KOH for 15 min. **b**, magnified view in the range of 1250-1500  $\text{cm}^{-1}$ .

32

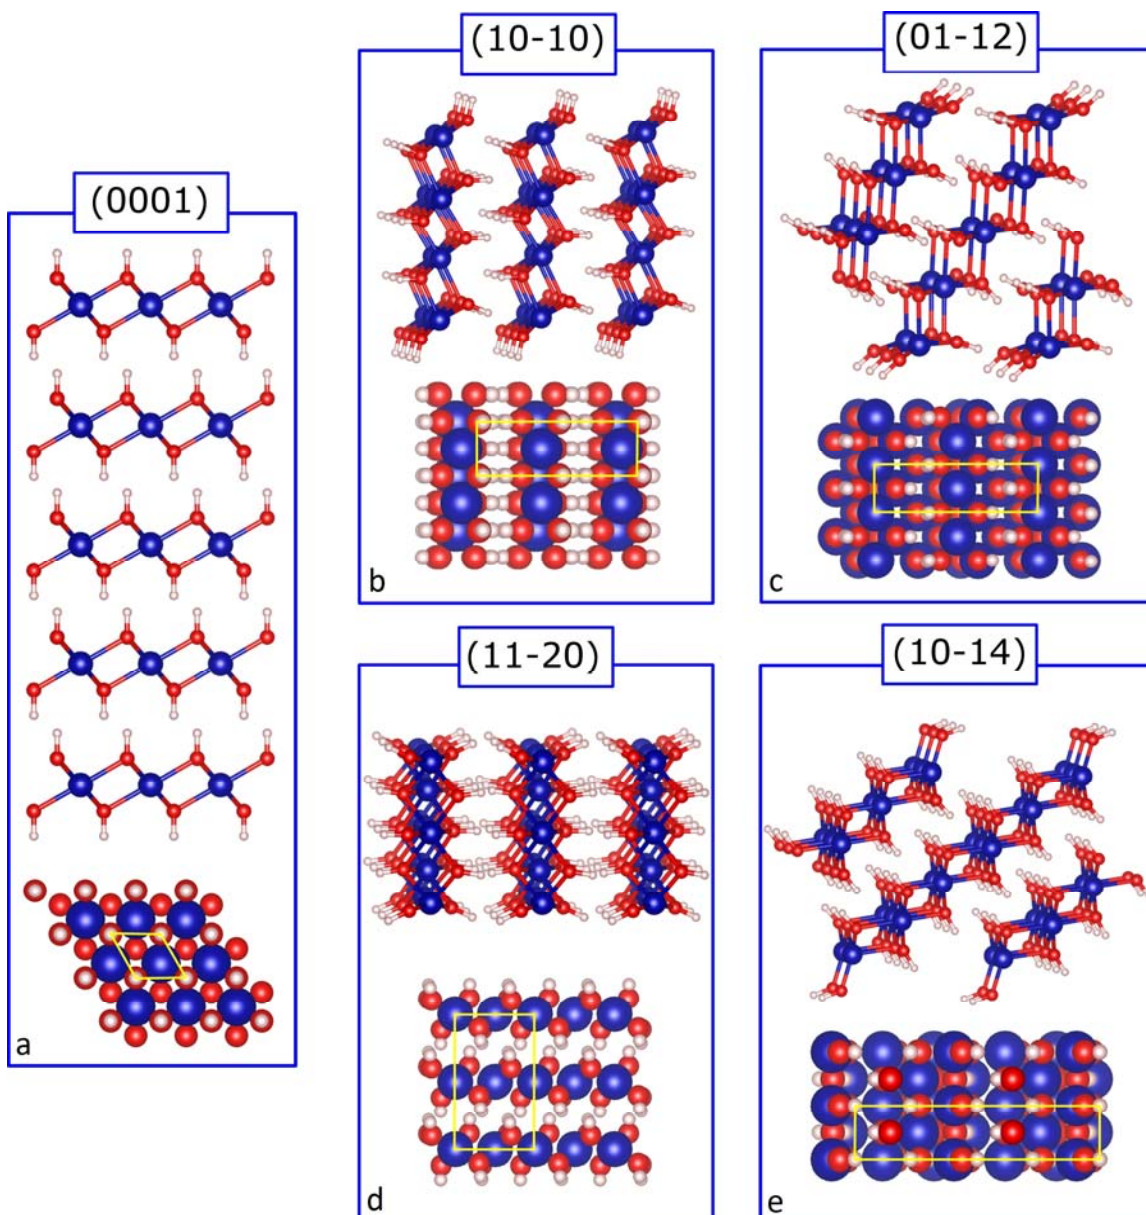

33

34

35 **Supplementary Figure 5** | Side and top views of the optimized geometries of the five

36  $\beta$ -Co(OH)<sub>2</sub> surfaces considered in this work. (0001), (10-10), (11-20), (01-12), and

37 (10-14). Yellow rectangles in top views indicate the unit cell. Red, white, and blue balls

38 stand for O, H, and Co atoms, respectively.

39

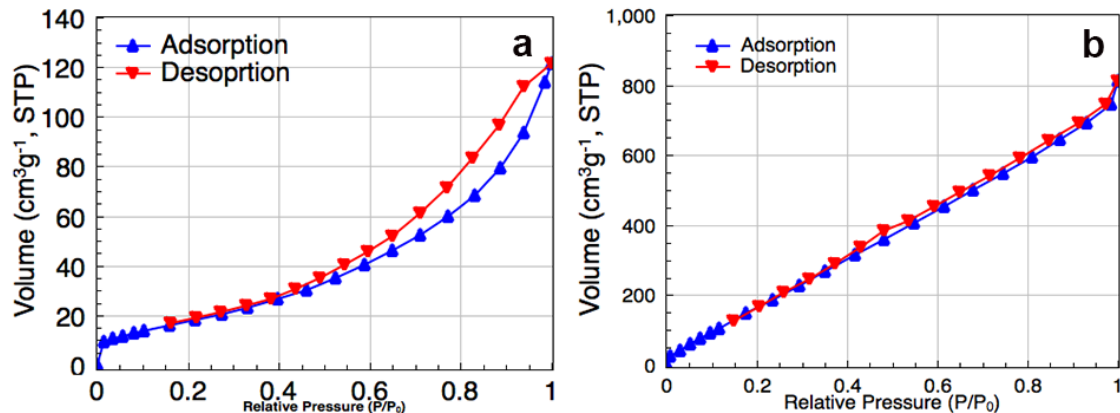

40

41 **Supplementary Figure 6** | N<sub>2</sub> isotherm tests of Co(OH)<sub>2</sub> before and after contacting  
42 with KOH solution. **a**, N<sub>2</sub> adsorption/desorption isotherms for the as-prepared  
43 Co(OH)<sub>2</sub>. **b**, N<sub>2</sub> adsorption/desorption isotherms for the Co(OH)<sub>2</sub> after bathing in  
44 KOH electrolyte for 15 min.

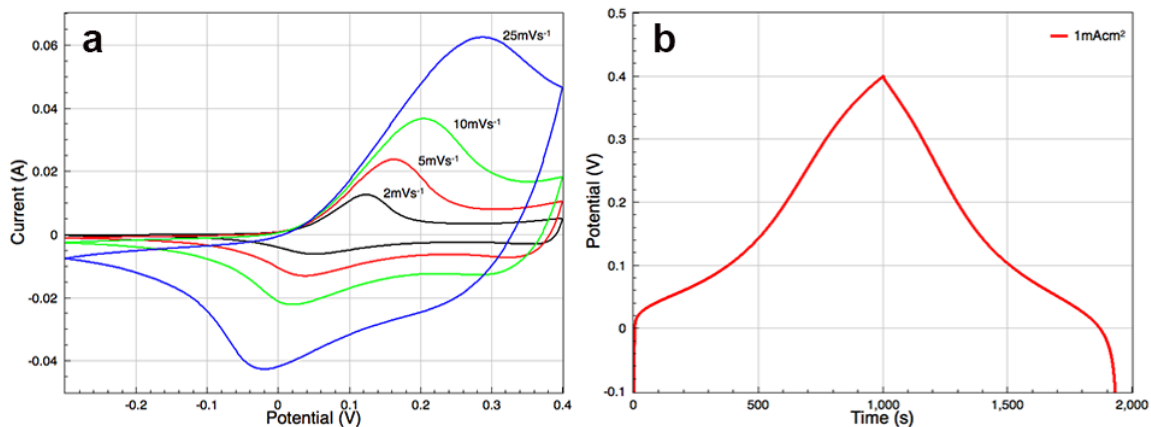

45

46 **Supplementary Figure 7** | Electrochemical measurements of  $\text{Co(OH)}_2$  with large  
 47 mass. **a**, Cyclic voltammety curves of  $\text{Co(OH)}_2$  collected at different scan rates (2, 5,  
 48 10 and 25  $\text{mVs}^{-1}$ , respectively). **b**, The charge/discharge curve collected at a  
 49 gavanostatic current density of  $1 \text{ mAcm}^{-2}$ .

50

51

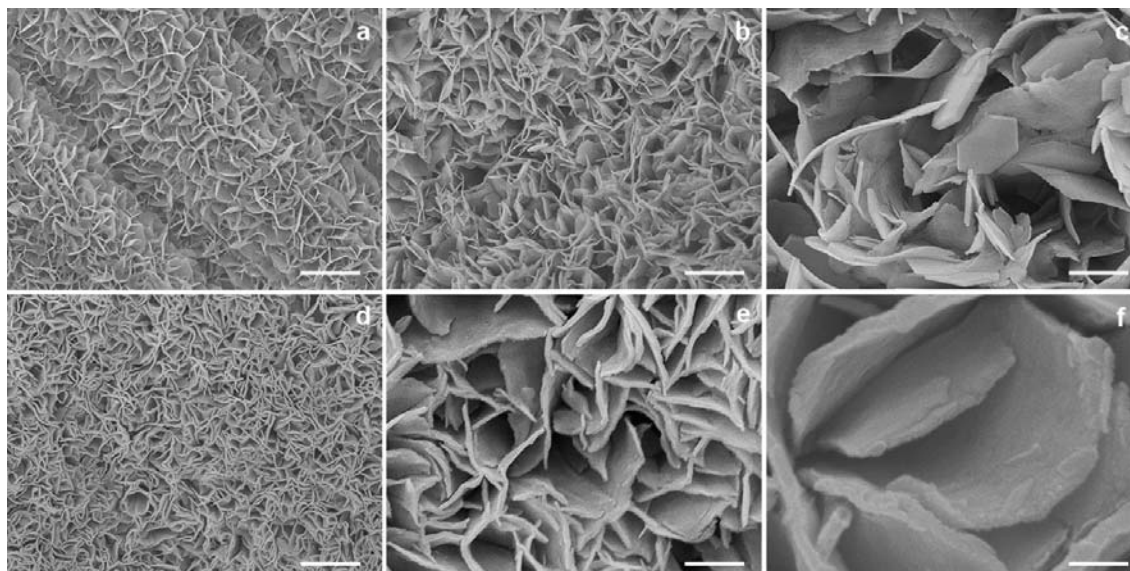

52

53 **Supplementary Figure 8** | SEM characterization of  $\text{Co(OH)}_2$  with low mass. **a**, SEM  
54 image of as-prepared  $\text{Co(OH)}_2$  with  $\sim 1.5$  mg. Scale bar,  $2 \mu\text{m}$ . **b and c**, after bathing in  
55  $1 \text{ M KOH}$  for  $15 \text{ min}$ . Scale bars,  $2 \mu\text{m}$  and  $500 \text{ nm}$ , respectively. **d to f**, after  $10000$   
56 cycles. Scale bars,  $2 \mu\text{m}$ ,  $400 \text{ nm}$  and  $100 \text{ nm}$ , respectively.

57



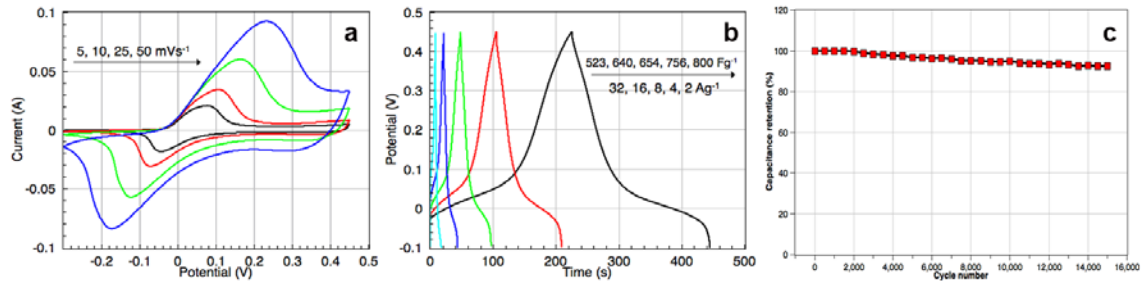

58

59 **Supplementary Figure 9** | Electrochemical performance of Co(OH)<sub>2</sub>/CFP. **a**, The  
 60 cyclic voltammograms collected at 5, 10, 25 and 50 mVs<sup>-1</sup> of Co(OH)<sub>2</sub> with ~1.5  
 61 mg. **b**, The charge/discharge curves collected at 2, 4, 8, 16 and 32 Ag<sup>-1</sup>, respectively.  
 62 The specific pseudocapacitance reaches 800 Fg<sup>-1</sup> at the current density of 2 Ag<sup>-1</sup>. **c**,  
 63 The synthesized Co(OH)<sub>2</sub> shows excellent cyclic stability and the capacitance  
 64 retention reaches >92% of its initial capacitance after 15000 cycles.

65

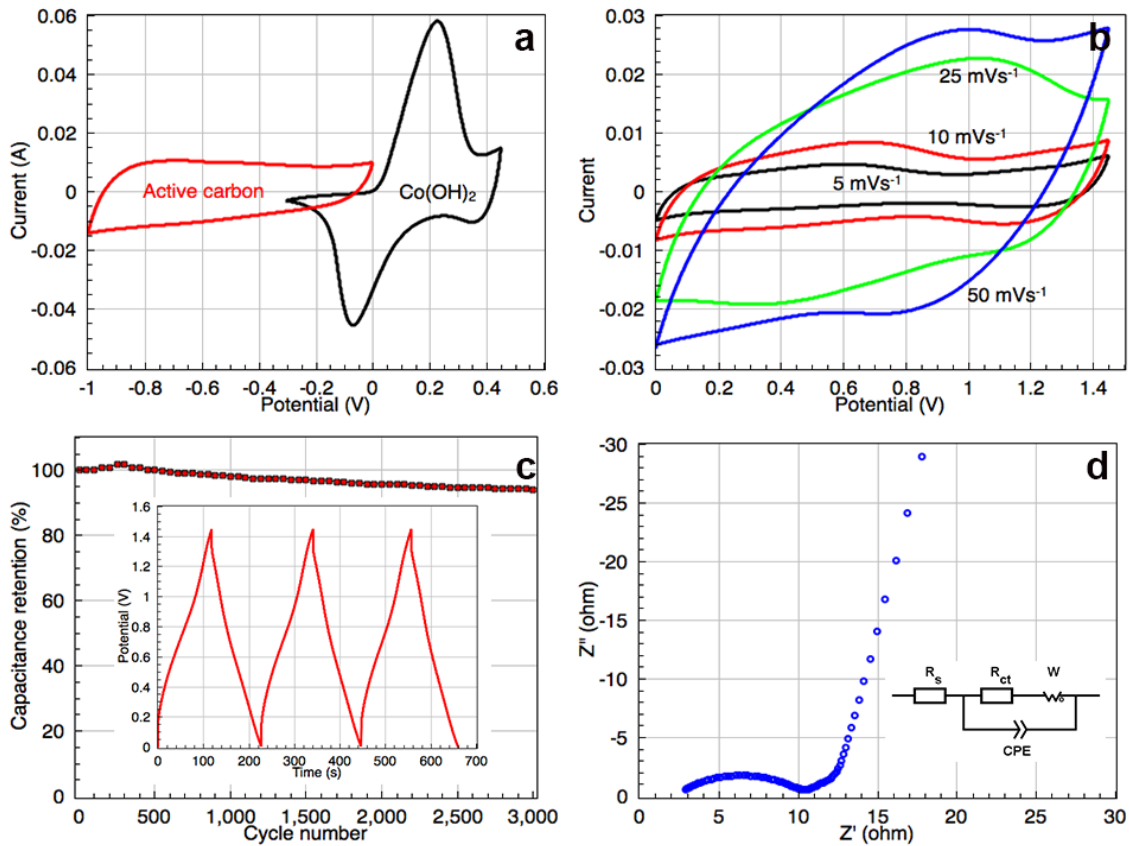

66

67 **Supplementary Figure 10** | Electrochemical performance of Co(OH)<sub>2</sub>-active carbon  
 68 asymmetric capacitor. **a**, The cyclic voltammetry curves of active carbon and Co(OH)<sub>2</sub>  
 69 at the scan speed of 10 mVs<sup>-1</sup>. **b**, The cyclic voltammetry curves collected at 5, 10, 25  
 70 and 50 mVs<sup>-1</sup> of Co(OH)<sub>2</sub>-active carbon asymmetric capacitor in 1 M KOH solution. **c**,  
 71 The asymmetric capacitor shows excellent cyclic stability and the capacitance  
 72 retention reaches 94.2% of its initial capacitance after 3000 cycles. The inset is the  
 73 charge/discharge curves collected at 1 Ag<sup>-1</sup>, the capacitance reaches 71 Fg<sup>-1</sup> and the  
 74 energy density of the asymmetric capacitor can be calculated as 20.74 Wh kg<sup>-1</sup> at a  
 75 power density of 1450 W kg<sup>-1</sup>. **d**. Nyquist plot of the Co(OH)<sub>2</sub>-active carbon  
 76 asymmetric capacitor. The inset is the electrical equivalent circuit used for fitting  
 77 impedance spectrum. R<sub>s</sub> represents a combined resistance of ionic resistance of  
 78 electrolyte, intrinsic resistance of substrate, and contact resistance at the active  
 79 material/current collector interface. R<sub>ct</sub> corresponds to the charge-transfer  
 80 resistance (the semicircle in the high-frequency range). CPE is the constant phase

81 element and  $W$  is the Warburg impedance. The calculated charge-transfer resistance  
82 for the capacitor is  $2.4 \Omega$ .

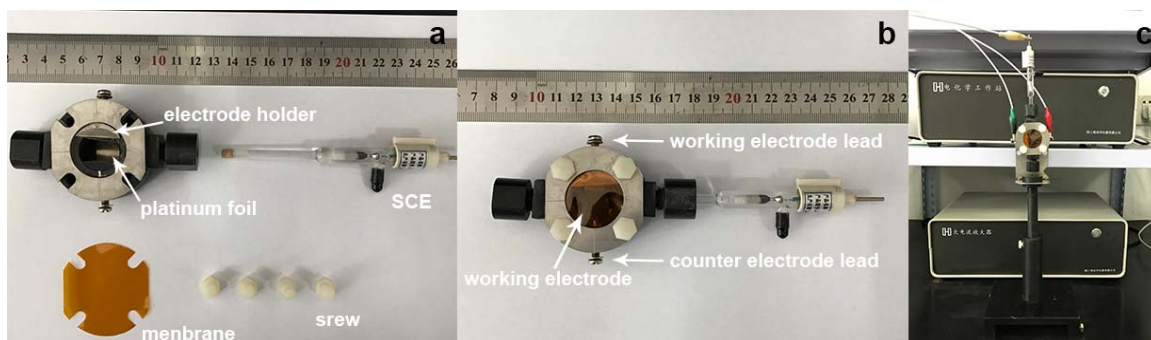

83

84

**Supplementary Figure 11** | Photos of the reaction cell for *in situ* experiment. **a**, The photographs of the device for *in-situ* XAS measurements. The platinum foil was previously embedded in the device and the electrode holder is used to secure the working electrode and to link external circuit. The screws are used to fix the membrane. **b**, The cell is assembled, and the two leads on both sides are used to link the electrochemistry instrument. **c**, The cell is hung in a height-tunable support and is ready for *in-situ* XAS measurements.

91

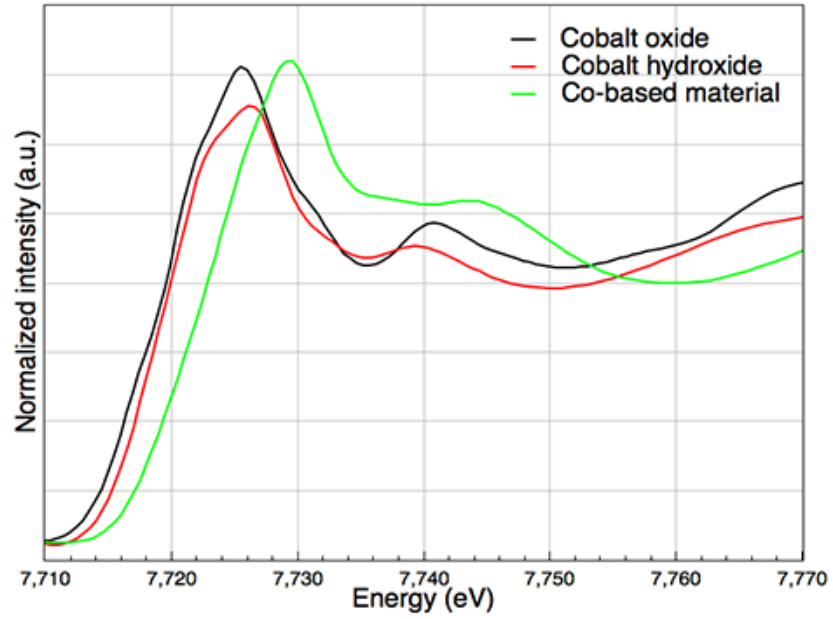

92

93 **Supplementary Figure 12** | XANES measurements of CoO, Co(OH)<sub>2</sub> and Co(OH)<sub>2</sub>  
94 after 30 cycles. Comparison of XANES data collected on as-prepared Co(OH)<sub>2</sub>  
95 electrode, CoO standard sample and Co(OH)<sub>2</sub> after 30 charge/discharge cycles.

96

97

98

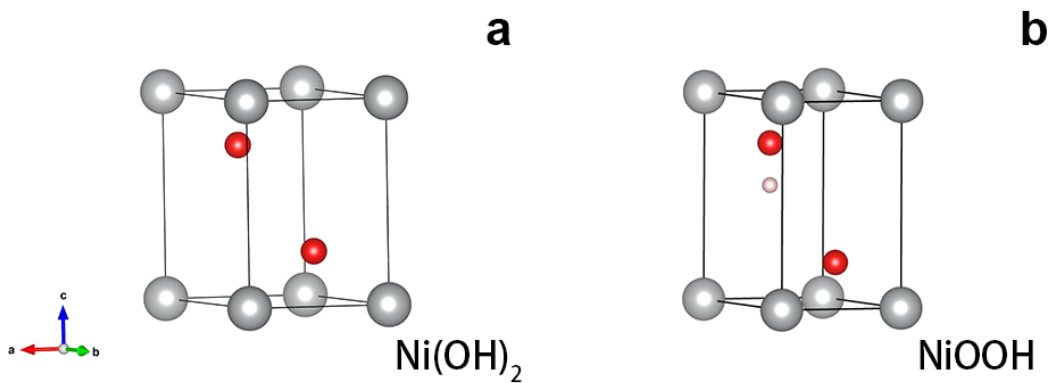

100 **Supplementary Figure 13** | Crystal models of  $\text{Ni(OH)}_2$  and  $\text{NiOOH}$ . Grey, red and  
101 pink balls stand for Ni, O and H atoms, respectively.

102

103

104

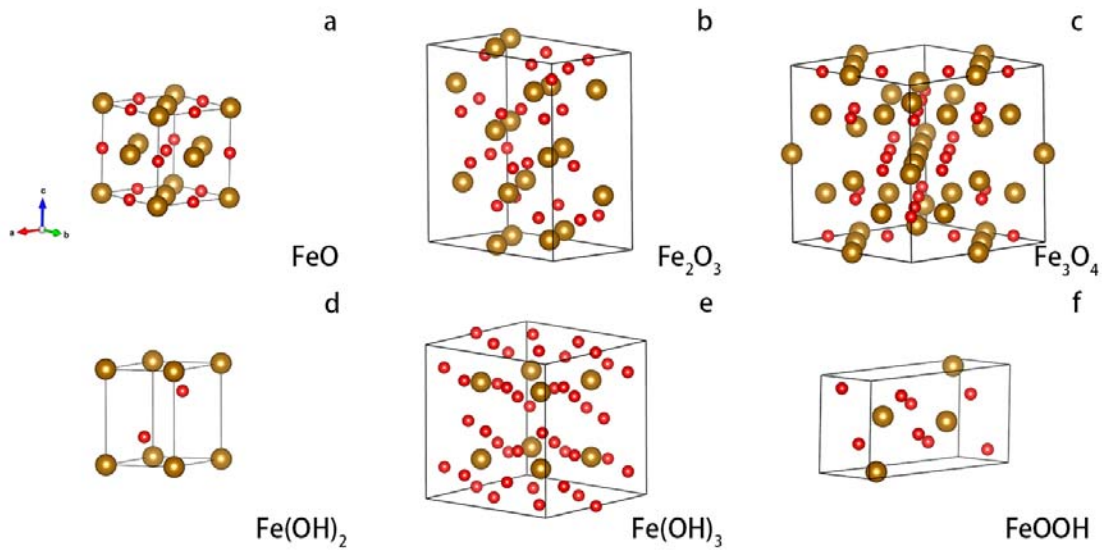

105

106 **Supplementary Figure 14** | Models for several Fe compounds. Gold and red balls

107 stand for Fe and O atoms, respectively.

108 **Supplementary Tables**

109 **Supplementary Table 1** | Computed surface energies (in meV/Å<sup>2</sup>) for the

110 lowest-energy surfaces of β-Co(OH)<sub>2</sub> represented in Supplementary Figure 3.

111

| Surface | $\gamma$ |
|---------|----------|
| (01-12) | 15.861   |
| (10-10) | 17.865   |
| (0001)  | 22.532   |
| (11-20) | 36.857   |
| (10-14) | 48.887   |

112



113 **Supplementary Table 2** | Peak shifts for in-situ XANES for Co(OH)<sub>2</sub>-CoOOH reaction

114

116

|   | Energy of peak shift (eV) | $\Delta E$ (eV) |
|---|---------------------------|-----------------|
| A | 7731.38                   | 0               |
| B | 7731.89                   | +0.58           |
| C | 7732.40                   | +1.02           |
| D | 7732.42                   | +1.04           |
| E | 7732.37                   | +0.99           |
| F | 7731.91                   | +0.53           |
| G | 7731.90                   | +0.52           |
| H | 7731.40                   | +0.02           |

117 **Supplementary Table 3** | Total energy values (in eV) for all of the minima and  
118 transition states shown in Figure 4a.

| State | Energy  | State | Energy  |
|-------|---------|-------|---------|
| A     | -42.806 | T1    | -42.007 |
| B     | -42.235 | T2    | -41.803 |
| C     | -42.008 | T3    | -41.787 |
| A*    | -42.161 | T1*   | -42.051 |
| B*    | -42.421 | T2*   | -41.892 |
| C*    | -43.395 | T3*   | -41.869 |

119

120

121 **Supplementary Table 4** | Supercell lattice vectors (in Å) and optimized atomic  
 122 fractional coordinates of A, B, C, T1, T2 and T3 states in Figure 4a.

| $\mathbf{a} = 3.1761 a_x + 0.0000 a_y + 0.0000 a_z$<br>$\mathbf{b} = -1.5881 b_x + 2.7506 b_y + 0.0000 b_z$<br>$\mathbf{c} = 0.0000 c_x + 0.0000 c_y + 9.3575 c_z$ |         |         |         |      |         |         |         |      |         |         |         |
|--------------------------------------------------------------------------------------------------------------------------------------------------------------------|---------|---------|---------|------|---------|---------|---------|------|---------|---------|---------|
| A                                                                                                                                                                  |         |         |         | B    |         |         |         | C    |         |         |         |
| Atom                                                                                                                                                               | x       | y       | z       | Atom | x       | y       | z       | Atom | x       | y       | z       |
| Co                                                                                                                                                                 | 0.00000 | 0.00000 | 0.49959 | Co   | 0.00000 | 0.00000 | 0.50000 | Co   | 0.00000 | 0.00000 | 0.50000 |
| Co                                                                                                                                                                 | 0.00000 | 0.00000 | 0.99982 | Co   | 0.00000 | 0.00000 | 0.00000 | Co   | 0.00000 | 0.00000 | 0.00000 |
| H                                                                                                                                                                  | 0.33333 | 0.66667 | 0.21654 | H    | 0.33333 | 0.66667 | 0.21167 | H    | 0.33333 | 0.66667 | 0.25000 |
| H                                                                                                                                                                  | 0.33333 | 0.66667 | 0.71647 | H    | 0.66667 | 0.33333 | 0.78833 | H    | 0.66667 | 0.33333 | 0.75000 |
| O                                                                                                                                                                  | 0.66667 | 0.33333 | 0.40698 | O    | 0.66667 | 0.33333 | 0.39872 | O    | 0.33333 | 0.66667 | 0.38514 |
| O                                                                                                                                                                  | 0.33333 | 0.66667 | 0.61168 | O    | 0.33333 | 0.66667 | 0.60128 | O    | 0.66667 | 0.33333 | 0.61486 |
| O                                                                                                                                                                  | 0.66667 | 0.33333 | 0.90715 | O    | 0.66667 | 0.33333 | 0.89358 | O    | 0.66667 | 0.33333 | 0.88514 |
| O                                                                                                                                                                  | 0.33333 | 0.66667 | 0.11177 | O    | 0.33333 | 0.66667 | 0.10642 | O    | 0.33333 | 0.66667 | 0.11486 |
| T1                                                                                                                                                                 |         |         |         | T2   |         |         |         | T3   |         |         |         |
| Atom                                                                                                                                                               | x       | y       | z       | Atom | x       | y       | z       | Atom | x       | y       | z       |
| Co                                                                                                                                                                 | 0.00373 | 0.99627 | 0.49652 | Co   | 0.00000 | 0.00000 | 0.50000 | Co   | 0.00000 | 0.00000 | 0.50000 |
| Co                                                                                                                                                                 | 0.00447 | 0.99553 | 0.00096 | Co   | 0.00000 | 0.00000 | 0.00000 | Co   | 0.00000 | 0.00000 | 0.00000 |
| H                                                                                                                                                                  | 0.34785 | 0.65215 | 0.21925 | H    | 0.47611 | 0.52389 | 0.27107 | H    | 0.35173 | 0.64827 | 0.21683 |
| H                                                                                                                                                                  | 0.52254 | 0.47746 | 0.73415 | H    | 0.52389 | 0.47611 | 0.72893 | H    | 0.64827 | 0.35173 | 0.78317 |
| O                                                                                                                                                                  | 0.48932 | 0.51068 | 0.38618 | O    | 0.50418 | 0.49582 | 0.37643 | O    | 0.45926 | 0.54074 | 0.37869 |
| O                                                                                                                                                                  | 0.48920 | 0.51080 | 0.62963 | O    | 0.49582 | 0.50418 | 0.62357 | O    | 0.54074 | 0.45926 | 0.62131 |
| O                                                                                                                                                                  | 0.64574 | 0.35426 | 0.90640 | O    | 0.65464 | 0.34536 | 0.89833 | O    | 0.66771 | 0.33229 | 0.89215 |
| O                                                                                                                                                                  | 0.33048 | 0.66952 | 0.11281 | O    | 0.34536 | 0.65464 | 0.10167 | O    | 0.33229 | 0.66771 | 0.10785 |

123

124

125 **Supplementary Table 5** | Supercell lattice vectors (in Å) and optimized atomic  
 126 fractional coordinates of A\*, B\*, C\*, T1\*, T2\* and T3\* states in Figure 4a.

| $\mathbf{a} = 3.0357 a_x + 0.0000 a_y + 0.0000 a_z$<br>$\mathbf{b} = -1.5178 b_x + 2.6290 b_y + 0.0000 b_z$<br>$\mathbf{c} = 0.0000 c_x + 0.0000 c_y + 8.8623 c_z$ |         |         |         |      |         |         |         |      |         |         |         |  |
|--------------------------------------------------------------------------------------------------------------------------------------------------------------------|---------|---------|---------|------|---------|---------|---------|------|---------|---------|---------|--|
| A*                                                                                                                                                                 |         |         |         | B*   |         |         |         | C*   |         |         |         |  |
| Atom                                                                                                                                                               | x       | y       | z       | Atom | x       | y       | z       | Atom | x       | y       | z       |  |
| Co                                                                                                                                                                 | 0.00000 | 0.00000 | 0.49486 | Co   | 0.00000 | 0.00000 | 0.50000 | Co   | 0.00000 | 0.00000 | 0.50000 |  |
| Co                                                                                                                                                                 | 0.00000 | 0.00000 | 0.99470 | Co   | 0.00000 | 0.00000 | 0.00000 | Co   | 0.00000 | 0.00000 | 0.00000 |  |
| H                                                                                                                                                                  | 0.33333 | 0.66667 | 0.22991 | H    | 0.33333 | 0.66667 | 0.22688 | H    | 0.33333 | 0.66667 | 0.25000 |  |
| H                                                                                                                                                                  | 0.33333 | 0.66667 | 0.72993 | H    | 0.66667 | 0.33333 | 0.77312 | H    | 0.66667 | 0.33333 | 0.75000 |  |
| O                                                                                                                                                                  | 0.66667 | 0.33333 | 0.39115 | O    | 0.66667 | 0.33333 | 0.38655 | O    | 0.33333 | 0.66667 | 0.38599 |  |
| O                                                                                                                                                                  | 0.33333 | 0.66667 | 0.61919 | O    | 0.33333 | 0.66667 | 0.61345 | O    | 0.66667 | 0.33333 | 0.61401 |  |
| O                                                                                                                                                                  | 0.66667 | 0.33333 | 0.89109 | O    | 0.66667 | 0.33333 | 0.88472 | O    | 0.66667 | 0.33333 | 0.88599 |  |
| O                                                                                                                                                                  | 0.33333 | 0.66667 | 0.11917 | O    | 0.33333 | 0.66667 | 0.11528 | O    | 0.33333 | 0.66667 | 0.11401 |  |
| T1*                                                                                                                                                                |         |         |         | T2*  |         |         |         | T3*  |         |         |         |  |
| Atom                                                                                                                                                               | x       | y       | z       | Atom | x       | y       | z       | Atom | x       | y       | z       |  |
| Co                                                                                                                                                                 | 0.96408 | 0.03592 | 0.49581 | Co   | 0.00000 | 0.00000 | 0.50000 | Co   | 0.00000 | 0.00000 | 0.50000 |  |
| Co                                                                                                                                                                 | 0.99124 | 0.00876 | 0.99916 | Co   | 0.00000 | 0.00000 | 0.00000 | Co   | 0.00000 | 0.00000 | 0.00000 |  |
| H                                                                                                                                                                  | 0.35834 | 0.64166 | 0.23032 | H    | 0.44832 | 0.55168 | 0.25347 | H    | 0.37149 | 0.62851 | 0.23665 |  |
| H                                                                                                                                                                  | 0.54413 | 0.45587 | 0.74474 | H    | 0.55168 | 0.44832 | 0.74653 | H    | 0.62851 | 0.37149 | 0.76335 |  |
| O                                                                                                                                                                  | 0.50556 | 0.49444 | 0.37298 | O    | 0.49479 | 0.50521 | 0.36982 | O    | 0.49907 | 0.50093 | 0.36684 |  |
| O                                                                                                                                                                  | 0.50024 | 0.49976 | 0.63170 | O    | 0.50521 | 0.49479 | 0.63018 | O    | 0.50093 | 0.49907 | 0.63316 |  |
| O                                                                                                                                                                  | 0.64887 | 0.35113 | 0.89396 | O    | 0.65734 | 0.34266 | 0.88807 | O    | 0.66998 | 0.33002 | 0.88705 |  |
| O                                                                                                                                                                  | 0.32087 | 0.67913 | 0.11633 | O    | 0.34266 | 0.65734 | 0.11193 | O    | 0.33002 | 0.66998 | 0.11295 |  |

127

128 **Supplementary Table 6** | Peak shifts of P3 and P4 for in-situ EXAFS for  
129 Co(OH)<sub>2</sub>-CoOOH reaction.

130

132

|   | P3 (Å)    | P4 (Å)    |
|---|-----------|-----------|
| A | 1.2885439 | 2.4543693 |
| B | 1.2885439 | 2.4543693 |
| C | 1.2578642 | 2.4543693 |
| D | 1.2578642 | 2.4236896 |
| E | 1.2578642 | 2.4236896 |
| F | 1.2885439 | 2.4543693 |
| G | 1.2885439 | 2.4543693 |
| H | 1.2885439 | 2.4543693 |

133 **Supplementary Table 7** | In-situ EXAFS fitting results for Co(OH)<sub>2</sub>-CoOOH reaction

134 <sup>a</sup> Coordination numbers <sup>b</sup> Bond lengths <sup>c</sup> Debye-Waller factors

| Sample | A R-factor : 0.007 |                    |                                               | D R-factor : 0.003 |       |                                  | H R-factor : 0.009 |       |                                  |
|--------|--------------------|--------------------|-----------------------------------------------|--------------------|-------|----------------------------------|--------------------|-------|----------------------------------|
|        | N <sup>a</sup>     | R (Å) <sup>b</sup> | σ <sup>2</sup> (Å <sup>2</sup> ) <sup>c</sup> | N                  | R (Å) | σ <sup>2</sup> (Å <sup>2</sup> ) | N                  | R (Å) | σ <sup>2</sup> (Å <sup>2</sup> ) |
| Co-O   | 4.2                | 1.93               | 0.005                                         | 4.2                | 1.88  | 0.003                            | 4.2                | 1.94  | 0.007                            |
| Co-Co  | 4.2                | 2.99               | 0.003                                         | 4.2                | 2.80  | 0.005                            | 4.2                | 3.02  | 0.003                            |

135

136
